# Supplementary material for: Hepatocellular Carcinoma Recurrence and Mortality Rate Post Liver Transplantation: Meta-Analysis and Systematic Review of Real-World Evidence
Source: MDPI journal article supplement (doi:10.3390/cancers14205114), 2022-10-19
Supplement: s1 [file s1]

**Table S1a: PubMed search strategy**

| S. No. | Query                                                                                                                                                                                                                                                                   | Items Found | Description                                                  |
|--------|-------------------------------------------------------------------------------------------------------------------------------------------------------------------------------------------------------------------------------------------------------------------------|-------------|--------------------------------------------------------------|
| #1     | "liver neoplasms"[MeSH] OR ("biliary tract" OR "hepatobiliary" OR "liver") AND (cancer* OR carcinom* OR neoplasm* OR tumor* OR sarcoma* OR tumour*) OR "ascites hepatomas" OR "hepatoblastomas" OR "liver carcinogenesis" OR "morris hepatomas" OR "novikoff hepatomas" | 3,81,354    | <b>Search terms:</b><br>Hepatocellular<br>Carcinoma          |
| #2     | Liver transplantation                                                                                                                                                                                                                                                   | 82,751      | <b>Search terms:</b><br>Liver transplantation                |
| #3     | Recurrence rate OR Survival Rate                                                                                                                                                                                                                                        | 2,98,765    | <b>Search terms:</b><br>Recurrence rate and<br>Survival rate |
|        | #1 AND #2 AND #3                                                                                                                                                                                                                                                        | 2,513       | <b>Combine search terms</b>                                  |

**Table S1b: Epistemonikos search strategy**

| S. No. | Query                                                                                                                                                                                                                                                                                                                                                                                                                                                                                                                                                                                                                                                                                                                                                                                                                                                                                                                                                                             | Items Found | Description                                         |
|--------|-----------------------------------------------------------------------------------------------------------------------------------------------------------------------------------------------------------------------------------------------------------------------------------------------------------------------------------------------------------------------------------------------------------------------------------------------------------------------------------------------------------------------------------------------------------------------------------------------------------------------------------------------------------------------------------------------------------------------------------------------------------------------------------------------------------------------------------------------------------------------------------------------------------------------------------------------------------------------------------|-------------|-----------------------------------------------------|
| #1     | (title:((title:(liver neoplasms) OR abstract:(liver neoplasms)) OR (title:(biliary tract cancer) OR abstract:(biliary tract cancer)) OR (title:(biliary tract carcinoma) OR abstract:(biliary tract carcinoma)) OR (title:(biliary tract tumor) OR abstract:(biliary tract tumor)) OR (title:(biliary tract sarcoma) OR abstract:(biliary tract sarcoma)) OR (title:(biliary tract tumour) OR abstract:(biliary tract tumour)) OR (title:(hepatobiliary cancer) OR abstract:(hepatobiliary cancer)) OR (title:(hepatobiliary carcinoma) OR abstract:(hepatobiliary carcinoma)) OR (title:(hepatobiliary tumor) OR abstract:(hepatobiliary tumor)) OR (title:(hepatobiliary sarcoma) OR abstract:(hepatobiliary sarcoma)) OR (title:(hepatobiliary tumour) OR abstract:(hepatobiliary tumour)) OR (title:(Liver cancer) OR abstract:(Liver cancer)) OR (title:(Liver carcinoma) OR abstract:(Liver carcinoma)) OR (title:(Liver tumor) OR abstract:(Liver tumor)) OR (title:(Liver |             | <b>Search terms:</b><br>Hepatocellular<br>Carcinoma |

|  |                                                                                                                                                                                                                                                                                                                                                                                                                                                                                                                                                                                                                                                                                                                                                                                                                                                                                                                                                                                                                                                                                                                                                                                                                                                                                                                                                                                                                                                                                                                                                                                                                                                                                                                                                                                                                                                                                                                                                                                                      |  |  |
|--|------------------------------------------------------------------------------------------------------------------------------------------------------------------------------------------------------------------------------------------------------------------------------------------------------------------------------------------------------------------------------------------------------------------------------------------------------------------------------------------------------------------------------------------------------------------------------------------------------------------------------------------------------------------------------------------------------------------------------------------------------------------------------------------------------------------------------------------------------------------------------------------------------------------------------------------------------------------------------------------------------------------------------------------------------------------------------------------------------------------------------------------------------------------------------------------------------------------------------------------------------------------------------------------------------------------------------------------------------------------------------------------------------------------------------------------------------------------------------------------------------------------------------------------------------------------------------------------------------------------------------------------------------------------------------------------------------------------------------------------------------------------------------------------------------------------------------------------------------------------------------------------------------------------------------------------------------------------------------------------------------|--|--|
|  | <p> sarcoma) OR abstract:(Liver sarcoma)) OR<br/> (title:(Liver tumour) OR abstract:(Liver<br/> tumour)) OR (title:(ascites hepatomas) OR<br/> abstract:(ascites hepatomas)) OR<br/> (title:(hepatoblastomas) OR<br/> abstract:(hepatoblastomas)) OR (title:(liver<br/> carcinogenesis) OR abstract:(liver<br/> carcinogenesis)) OR (title:(morris hepatomas)<br/> OR abstract:(morris hepatomas)) OR<br/> (title:(novikoff hepatomas) OR<br/> abstract:(novikoff hepatomas))) OR<br/> abstract:((title:(liver neoplasms) OR<br/> abstract:(liver neoplasms)) OR (title:(biliary<br/> tract cancer) OR abstract:(biliary tract cancer))<br/> OR (title:(biliary tract carcinoma) OR<br/> abstract:(biliary tract carcinoma)) OR<br/> (title:(biliary tract tumor) OR abstract:(biliary<br/> tract tumor)) OR (title:(biliary tract sarcoma)<br/> OR abstract:(biliary tract sarcoma)) OR<br/> (title:(biliary tract tumour) OR abstract:(biliary<br/> tract tumour)) OR (title:(hepatobiliary cancer)<br/> OR abstract:(hepatobiliary cancer)) OR<br/> (title:(hepatobiliary carcinoma) OR<br/> abstract:(hepatobiliary carcinoma)) OR<br/> (title:(hepatobiliary tumor) OR<br/> abstract:(hepatobiliary tumor)) OR<br/> (title:(hepatobiliary sarcoma) OR<br/> abstract:(hepatobiliary sarcoma)) OR<br/> (title:(hepatobiliary tumour) OR<br/> abstract:(hepatobiliary tumour)) OR (title:(Liver<br/> cancer) OR abstract:(Liver cancer)) OR<br/> (title:(Liver carcinoma) OR abstract:(Liver<br/> carcinoma)) OR (title:(Liver tumor) OR<br/> abstract:(Liver tumor)) OR (title:(Liver<br/> sarcoma) OR abstract:(Liver sarcoma)) OR<br/> (title:(Liver tumour) OR abstract:(Liver<br/> tumour)) OR (title:(ascites hepatomas) OR<br/> abstract:(ascites hepatomas)) OR<br/> (title:(hepatoblastomas) OR<br/> abstract:(hepatoblastomas)) OR (title:(liver<br/> carcinogenesis) OR abstract:(liver<br/> carcinogenesis)) OR (title:(morris hepatomas)<br/> OR abstract:(morris hepatomas)) OR </p> |  |  |
|--|------------------------------------------------------------------------------------------------------------------------------------------------------------------------------------------------------------------------------------------------------------------------------------------------------------------------------------------------------------------------------------------------------------------------------------------------------------------------------------------------------------------------------------------------------------------------------------------------------------------------------------------------------------------------------------------------------------------------------------------------------------------------------------------------------------------------------------------------------------------------------------------------------------------------------------------------------------------------------------------------------------------------------------------------------------------------------------------------------------------------------------------------------------------------------------------------------------------------------------------------------------------------------------------------------------------------------------------------------------------------------------------------------------------------------------------------------------------------------------------------------------------------------------------------------------------------------------------------------------------------------------------------------------------------------------------------------------------------------------------------------------------------------------------------------------------------------------------------------------------------------------------------------------------------------------------------------------------------------------------------------|--|--|

|    |                                                                     |       |                                               |
|----|---------------------------------------------------------------------|-------|-----------------------------------------------|
|    | (title:(novikoff hepatomas) OR abstract:(novikoff hepatomas))))     |       |                                               |
| #2 | (title:(Liver transplantation) OR abstract:(Liver transplantation)) |       | <b>Search terms:</b><br>Liver transplantation |
| #3 | #1 AND #2                                                           | 1,515 | Combine search terms                          |

**Table S2:** Reasons for excluded studies

| Study ID                       | Title                                                                                                                                                                                   | Included/Excluded | Reason for Exclusion    |
|--------------------------------|-----------------------------------------------------------------------------------------------------------------------------------------------------------------------------------------|-------------------|-------------------------|
| A. A. M. Al-Ameri et al. 2019  | Preoperative risk stratification for early recurrence of HBV-related hepatocellular carcinoma after deceased donor liver transplantation: a five-eight model development and validation | Excluded          | Irrelevant Subgroup     |
| S. F. Ang et al. 2015          | The Singapore Liver Cancer Recurrence (SLICER) Score for relapse prediction in patients with surgically resected hepatocellular carcinoma                                               | Excluded          | Intervention irrelevant |
| U. Baccarani et al. 2008       | Superiority of transplantation versus resection for the treatment of small hepatocellular carcinoma                                                                                     | Excluded          | Irrelevant Sub group    |
| J. F. Castroagudín et al. 2009 | Safety of an immunosuppressant protocol based on sirolimus in liver transplant recipients with malignancies or high risk of tumor recurrence                                            | Excluded          | Irrelevant Sub group    |
| S. Chinnakotla et al. 2009     | Impact of sirolimus on the recurrence of hepatocellular carcinoma after liver transplantation                                                                                           | Excluded          | Irrelevant Sub group    |
| O. Detry et al. 2015           | Prognostic value of (18)F-FDG PET/CT in liver transplantation for hepatocarcinoma                                                                                                       | Excluded          | Outcome irrelevant      |
| S. Dumitra et al. 2013         | Hepatitis C infection and hepatocellular carcinoma in liver transplantation: a 20-year experience                                                                                       | Excluded          | Irrelevant Sub group    |
| S. T. Fan et al. 2009          | Follow-up of Chinese liver transplant recipients in Hong Kong                                                                                                                           | Excluded          | Irrelevant Sub group    |
| J. Figueras et al. 1997        | Survival after liver transplantation in cirrhotic patients with and without hepatocellular carcinoma: a comparative study                                                               | Excluded          | study design irrelevant |
| J. Fujimoto et al. 1993        | Efficacy of autotransfusion in hepatectomy for hepatocellular carcinoma                                                                                                                 | Excluded          | Outcome irrelevant      |
| A. E. Giakoustidis et al. 2017 | Immunosuppression strategies in liver transplantation patient; patients with hepatocellular carcinoma                                                                                   | Excluded          | Outcome irrelevant      |
| B. Hu et al. 2014              | Systemic immune-inflammation index predicts prognosis of patients after curative resection for hepatocellular carcinoma                                                                 | Excluded          | population irrelevant   |
| Z. Hu et al. 2012              | Recipient outcomes of salvage liver transplantation versus primary liver transplantation: a systematic review and meta-analysis                                                         | Excluded          | study design irrelevant |

| Study ID                  | Title                                                                                                                                                                                | Included/Excluded | Reason for Exclusion    |
|---------------------------|--------------------------------------------------------------------------------------------------------------------------------------------------------------------------------------|-------------------|-------------------------|
| Z. Hu et al. 2015         | Impact of multiple liver resections prior to salvage liver transplantation on survival in patients with recurrent HCC                                                                | Excluded          | Population Irrelevant   |
| W. H. Kang et al. 2017    | Prognostic effect of transarterial chemoembolization-induced complete pathological response in patients undergoing liver resection and transplantation for hepatocellular carcinoma  | Excluded          | Irrelevant Sub group    |
| D. J. Kim et al. 2014     | Recurrence of hepatocellular carcinoma: importance of mRECIST response to chemoembolization and tumor size                                                                           | Excluded          | study design irrelevant |
| J. M. Kim et al. 2014     | Expanded criteria for liver transplantation in patients with hepatocellular carcinoma                                                                                                | Excluded          | Outcome irrelevant      |
| V. Kohli et al. 2012      | Antiviral therapy for recurrent hepatitis C reduces recurrence of hepatocellular carcinoma following liver transplantation                                                           | Excluded          | Irrelevant Sub group    |
| A. Kornberg et al. 2009   | Increased 18F-FDG uptake of hepatocellular carcinoma on positron emission tomography independently predicts tumor recurrence in liver transplant patients                            | excluded          | Outcome irrelevant      |
| A. Kornberg et al. 2013   | Postinterventional tumor necrosis predicts recurrence-free long-term survival in liver transplant patients with advanced hepatocellular carcinoma                                    | excluded          | Outcome irrelevant      |
| A. Lauterio et al. 2010   | Hepatocellular carcinoma in unrelated viral cirrhosis: long-term results after liver transplantation                                                                                 | Excluded          | Outcome irrelevant      |
| E. C. Lee et al. 2016     | High-dose hepatitis B immunoglobulin therapy in hepatocellular carcinoma with hepatitis B virus-DNA/hepatitis B e antigen-positive patients after living donor liver transplantation | Excluded          | Outcome irrelevant      |
| J. Lei et al. 2013        | Comparison of the outcomes of patients who underwent deceased-donor or living-donor liver transplantation after successful downstaging therapy                                       | Excluded          | Irrelevant Sub group    |
| D. Lu et al. 2018         | The association between donor genetic variations in one-carbon metabolism pathway genes and hepatitis B recurrence after liver transplantation                                       | Excluded          | Outcome Irrelevant      |
| V. R. Mas et al. 2007     | Genes associated with progression and recurrence of hepatocellular carcinoma in hepatitis C patients waiting and undergoing liver transplantation: preliminary results               | Excluded          | Outcome irrelevant      |
| V. Mazzaferro et al. 2018 | Metroticket 2.0 Model for Analysis of Competing Risks of Death After Liver Transplantation for Hepatocellular Carcinoma                                                              | Excluded          | Irrelevant Sub group    |

| Study ID                   | Title                                                                                                                                                                                                   | Included/Excluded | Reason for Exclusion        |
|----------------------------|---------------------------------------------------------------------------------------------------------------------------------------------------------------------------------------------------------|-------------------|-----------------------------|
| J. Michel et al. 1995      | Recurrence of hepatocellular carcinoma in cirrhotic patients after liver resection or transplantation                                                                                                   | Excluded          | Not available               |
| J. Michel et al. 1997      | Liver resection or transplantation for hepatocellular carcinoma? Retrospective analysis of 215 patients with cirrhosis                                                                                  | Excluded          | Irrelevant Sub group        |
| T. Miyata et al. 2022      | The Impact of Histologic Liver Inflammation on Oncology and the Prognosis of Patients Undergoing Hepatectomy for Hepatocellular Carcinoma                                                               | Excluded          | Not available               |
| P. Moreno et al. 1995      | Orthotopic liver transplantation: treatment of choice in cirrhotic patients with hepatocellular carcinoma?                                                                                              | Excluded          | Not available               |
| M. Murawski et al. 2016    | Hepatocellular Carcinoma in Children: Does Modified Platinum- and Doxorubicin-Based Chemotherapy Increase Tumor Resectability and Change Outcome? Lessons Learned From the SIOPEL 2 and 3 Studies       | Excluded          | Study design irrelevant     |
| H. Nafady-Hego et al. 2016 | Outcome of Hepatitis B Virus Infection After Living-Donor Liver Transplant: A Single-center Experience Over 20 Years                                                                                    | Excluded          | Population irrelevant       |
| Y. Nagaoki et al. 2019     | The impact of interferon-free direct-acting antivirals on clinical outcome after curative treatment for hepatitis C virus-associated hepatocellular carcinoma: Comparison with interferon-based therapy | Excluded          | Population irrelevant       |
| A. Nanashima et al. 2010   | Relationship between period of survival and clinicopathological characteristics in patients with hepatocellular carcinoma who underwent hepatectomy                                                     | Excluded          | Population irrelevant       |
| P. Neuhaus et al. 1999     | Liver transplantation for hepatocellular carcinoma                                                                                                                                                      | Excluded          | Publication type irrelevant |
| D. Nobuoka et al. 2010     | Postoperative serum alpha-fetoprotein level is a useful predictor of recurrence after hepatectomy for hepatocellular carcinoma                                                                          | Excluded          | Population irrelevant       |
| Y. Okuda et al. 2014       | Clinicopathological factors affecting survival and recurrence after initial hepatectomy in non-B non-C hepatocellular carcinoma patients with comparison to hepatitis B or C virus                      | Excluded          | Population irrelevant       |
| G. Orlando et al. 2013     | Hepatic hemangiosarcoma: an absolute contraindication to liver transplantation--the European Liver Transplant Registry experience                                                                       | Excluded          | Population irrelevant       |

| Study ID                           | Title                                                                                                                                                                             | Included/Excluded | Reason for Exclusion    |
|------------------------------------|-----------------------------------------------------------------------------------------------------------------------------------------------------------------------------------|-------------------|-------------------------|
| G. Otto et al. 2006                | Response to transarterial chemoembolization as a biological selection criterion for liver transplantation in hepatocellular carcinoma                                             | Excluded          | Population irrelevant   |
| P. M. Rizzi et al. 1994            | Neoadjuvant chemotherapy after liver transplantation for hepatocellular carcinoma                                                                                                 | Excluded          | Not available           |
| S. Saab et al. 2010                | Sorafenib as adjuvant therapy for high-risk hepatocellular carcinoma in liver transplant recipients: feasibility and efficacy                                                     | Excluded          | Not available           |
| S. Saab et al. 2009                | Recurrence of hepatocellular carcinoma and hepatitis B reinfection in hepatitis B surface antigen-positive patients after liver transplantation                                   | Excluded          | Population irrelevant   |
| M. I. Sánchez-Lorencio et al. 2018 | Matrix Metalloproteinase 1 as a Novel Biomarker for Monitoring Hepatocellular Carcinoma in Liver Transplant Patients                                                              | Excluded          | Outcome irrelevant      |
| G. Sapisochin et al. 2011          | Mixed hepatocellular cholangiocarcinoma and intrahepatic cholangiocarcinoma in patients undergoing transplantation for hepatocellular carcinoma                                   | Excluded          | Irrelevant Sub group    |
| Y. Sato et al. 2005                | Preoperative human-telomerase reverse transcriptase mRNA in peripheral blood and tumor recurrence in living-related liver transplantation for hepatocellular carcinoma            | Excluded          | Not available           |
| O. Scatton et al. 2008             | Hepatocellular carcinoma developed on compensated cirrhosis: resection as a selection tool for liver transplantation                                                              | Excluded          | Irrelevant Sub group    |
| M. Schwartz et al. 2005            | How should patients with hepatocellular carcinoma recurrence after liver transplantation be treated?                                                                              | Excluded          | Study design irrelevant |
| Z. Shao et al. 2008                | Orthotopic liver transplantation as a rescue operation for recurrent hepatocellular carcinoma after partial hepatectomy                                                           | Excluded          | Irrelevant Sub group    |
| I. S. Sheen et al. 2005            | Do the expressions of gap junction gene connexin messenger RNA in noncancerous liver remnants of patients with hepatocellular carcinoma correlate with postoperative recurrences? | Excluded          | Population irrelevant   |
| G. C. Sotiropoulos et al. 2008     | Single-center experience on liver transplantation for hepatocellular carcinoma arising in alcoholic cirrhosis: results and ethical issues                                         | Excluded          | Study design irrelevant |
| G. C. Sotiropoulos et al. 2006     | De novo hepatocellular carcinoma in recurrent liver cirrhosis after liver transplantation for benign hepatic disease: is a deceased donor re-transplantation justified?           | Excluded          | Study design irrelevant |

| Study ID                            | Title                                                                                                                                                                               | Included/Excluded | Reason for Exclusion  |
|-------------------------------------|-------------------------------------------------------------------------------------------------------------------------------------------------------------------------------------|-------------------|-----------------------|
| T. E. Starzl et al. 1978            | Surgical approaches for primary and metastatic liver neoplasms, including total hepatectomy with orthotopic liver transplantation                                                   | Excluded          | Population irrelevant |
| L. Y. Sun et al. 2014               | Prognosis in liver transplantation recipients after hepatitis B virus recurrence                                                                                                    | Excluded          | Not available         |
| M. Tonolini et al. 2002             | Extrahepatic recurrence and second malignancies after treatment of hepatocellular carcinoma: spectrum of imaging findings                                                           | Excluded          | Not available         |
| A. D. Trobaugh-Lotrario et al. 2016 | Outcomes of Patients With Relapsed Hepatoblastoma Enrolled on Children's Oncology Group (COG) Phase I and II Studies                                                                | Excluded          | Population irrelevant |
| Y. F. Tsai et al. 2016              | Nationwide population-based study reveals increased malignancy risk in taiwanese liver transplant recipients                                                                        | Excluded          | Outcome irrelevant    |
| D. I. Tsilimigras et al. 2020       | Recurrence Patterns and Outcomes after Resection of Hepatocellular Carcinoma within and beyond the Barcelona Clinic Liver Cancer Criteria                                           | Excluded          | Population irrelevant |
| S. Tsukamoto et al. 2014            | Survival after resection of liver and lung colorectal metastases in the era of modern multidisciplinary therapy                                                                     | Excluded          | Population irrelevant |
| J. Tu et al. 2015                   | Effectiveness of combined (131)I-chTNT and radiofrequency ablation therapy in treating advanced hepatocellular carcinoma                                                            | Excluded          | Population irrelevant |
| K. Uchino et al. 2018               | Serum levels of ferritin do not affect the prognosis of patients with hepatocellular carcinoma undergoing radiofrequency ablation                                                   | Excluded          | Population irrelevant |
| S. Uemura et al. 2014               | ERCC1 mRNA expression as a postoperative prognostic marker in extrahepatic bile duct cancer                                                                                         | Excluded          | Population irrelevant |
| H. Ueno et al. 2004                 | Predictors of extrahepatic recurrence after resection of colorectal liver metastases                                                                                                | Excluded          | Population irrelevant |
| K. Umeda et al. 2018                | Prognostic and therapeutic factors influencing the clinical outcome of hepatoblastoma after liver transplantation: A single-institute experience                                    | Excluded          | Population irrelevant |
| K. Vakili et al. 2009               | Living donor liver transplantation for hepatocellular carcinoma: Increased recurrence but improved survival                                                                         | Excluded          | Irrelevant Sub group  |
| A. Van Der Gucht et al. 2017        | Resin Versus Glass Microspheres for (90)Y Transarterial Radioembolization: Comparing Survival in Unresectable Hepatocellular Carcinoma Using Pretreatment Partition Model Dosimetry | Excluded          | Population irrelevant |
| E. P. van der Stok et al. 2016      | mRNA expression profiles of colorectal liver metastases as a novel biomarker for early recurrence after partial hepatectomy                                                         | Excluded          | Population irrelevant |

| Study ID                   | Title                                                                                                                                                                                                                                                                    | Included/Excluded | Reason for Exclusion    |
|----------------------------|--------------------------------------------------------------------------------------------------------------------------------------------------------------------------------------------------------------------------------------------------------------------------|-------------------|-------------------------|
| M. A. Varona et al. 2015   | Risk factors of hepatocellular carcinoma recurrence after liver transplantation: accuracy of the alpha-fetoprotein model in a single-center experience                                                                                                                   | Excluded          | Not available           |
| B. Vasavada et al. 2016    | Prior Trans-arterial chemoembolization - A protective factor against rapid HCV recurrence post liver transplant in patients with HCV with HCC? - A Retrospective Cohort Study                                                                                            | Excluded          | Outcome irrelevant      |
| B. B. Vasavada et al. 2015 | Rapid fibrosis and significant histologic recurrence of hepatitis C after liver transplant is associated with higher tumor recurrence rates in hepatocellular carcinomas associated with hepatitis C virus-related liver disease: a single center retrospective analysis | Excluded          | Not available           |
| M. A. Veenstra et al. 2016 | Minimally-invasive liver resection in pediatric patients: initial experience and outcomes                                                                                                                                                                                | Excluded          | Population irrelevant   |
| E. Virgilio et al. 2016    | Port Site Recurrences Following Laparoscopic Liver Resection for Hepatocellular Carcinoma                                                                                                                                                                                | Excluded          | Study design irrelevant |
| M. Vivarelli et al. 2010   | Sirolimus in liver transplant recipients: a large single-center experience                                                                                                                                                                                               | Excluded          | Outcome irrelevant      |
| T. Wakai et al. 2002       | Computed tomographic features of hepatocellular carcinoma predict long-term survival after hepatic resection                                                                                                                                                             | Excluded          | Not available           |
| T. Wakai et al. 2001       | Early gallbladder carcinoma does not warrant radical resection                                                                                                                                                                                                           | Excluded          | Population irrelevant   |
| K. Wakayama et al. 2017    | Huge hepatocellular carcinoma greater than 10 cm in diameter worsens prognosis by causing distant recurrence after curative resection                                                                                                                                    | Excluded          | Outcome irrelevant      |
| S. Wan et al. 2015         | Polymorphisms in Genes of Tricarboxylic Acid Cycle Key Enzymes Are Associated with Early Recurrence of Hepatocellular Carcinoma                                                                                                                                          | Excluded          | Population irrelevant   |
| B. Wang et al. 2020        | Tfr-Tfh index: A new predictor for recurrence of hepatocellular carcinoma patients with HBV infection after curative resection                                                                                                                                           | Excluded          | Population irrelevant   |
| H. Wang et al. 2021        | Postoperative adjuvant transcatheter arterial chemoembolization improves the prognosis of patients with huge hepatocellular carcinoma                                                                                                                                    | Excluded          | Population irrelevant   |
| L. Wang et al. 2015        | Identification of recurrence-related serum microRNAs in hepatocellular carcinoma following hepatectomy                                                                                                                                                                   | Excluded          | Population irrelevant   |
| Q. Wang et al. 2016        | Impact of non-neoplastic vs intratumoural hepatitis B viral DNA and replication on hepatocellular carcinoma recurrence                                                                                                                                                   | Excluded          | Population irrelevant   |



| Study ID                 | Title                                                                                                                                                                                                | Included/Excluded | Reason for Exclusion  |
|--------------------------|------------------------------------------------------------------------------------------------------------------------------------------------------------------------------------------------------|-------------------|-----------------------|
| X. Wang et al. 2016      | Combined measurements of tumor number and size helps estimate the outcome of resection of Barcelona clinic liver cancer stage B hepatocellular carcinoma                                             | Excluded          | Population irrelevant |
| K. N. Wanis et al. 2018  | Intermediate-term survival and quality of life outcomes in patients with advanced colorectal liver metastases undergoing associating liver partition and portal vein ligation for staged hepatectomy | Excluded          | Population irrelevant |
| T. Wei et al. 2021       | Early Versus Late Recurrence of Hepatocellular Carcinoma After Surgical Resection Based on Post-recurrence Survival: an International Multi-institutional Analysis                                   | Excluded          | Population irrelevant |
| P. Y. Wong et al. 1995   | Clinical course and survival after liver transplantation for hepatitis B virus infection complicated by hepatocellular carcinoma                                                                     | Excluded          | Outcome irrelevant    |
| D. Xuan et al. 2021      | Survival comparison between radiofrequency ablation and surgical resection for patients with small hepatocellular carcinoma: A systematic review and meta-analysis                                   | Excluded          | Population irrelevant |
| Y. Yamashita et al. 2013 | Third or more repeat hepatectomy for recurrent hepatocellular carcinoma                                                                                                                              | Excluded          | Population irrelevant |
| J. D. Yang et al. 2016   | Direct acting antiviral therapy and tumor recurrence after liver transplantation for hepatitis C-associated hepatocellular carcinoma                                                                 | Excluded          | Irrelevant Sub group  |
| S. Yilmaz et al. 2021    | The Importance of the Immunosuppressive Regime on Hepatocellular Carcinoma Recurrence After Liver Transplantation                                                                                    | Excluded          | Not available         |
| L. P. Zanaga et al. 2017 | Survival benefits of interferon-based therapy in patients with recurrent hepatitis C after orthotopic liver transplantation                                                                          | Excluded          | Outcome irrelevant    |
| J. Zhang et al. 2016     | Prospective, single-center cohort study analyzing the efficacy of complete laparoscopic resection on recurrent hepatocellular carcinoma                                                              | Excluded          | Population irrelevant |
| X. F. Zhang et al. 2014  | Impact of cigarette smoking on outcome of hepatocellular carcinoma after surgery in patients with hepatitis B                                                                                        | Excluded          | Population irrelevant |
| Y. T. Zhang et al. 2015  | Vincristine and irinotecan in children with relapsed hepatoblastoma: a single-institution experience                                                                                                 | Excluded          | Population irrelevant |
| Y. M. Zhou et al. 2011   | Safety and efficacy of partial hepatectomy for huge ( $\geq 10$ cm) hepatocellular carcinoma: a systematic review                                                                                    | Excluded          | Population irrelevant |
| G. Q. Zhu et al. 2015    | Optimal adjuvant therapy for resected hepatocellular carcinoma: a systematic review with network meta-analysis                                                                                       | Excluded          | Population irrelevant |

| Study ID                   | Title                                                                                                                                                                                | Included/Excluded | Reason for Exclusion  |
|----------------------------|--------------------------------------------------------------------------------------------------------------------------------------------------------------------------------------|-------------------|-----------------------|
| J. Zhu et al. 2011         | CEACAM1 cytoplasmic expression is closely related to tumor angiogenesis and poorer relapse-free survival after curative resection of hepatocellular carcinoma                        | Excluded          | Population irrelevant |
| Z. Hu et al. 2014          | Salvage liver transplantation for recurrent hepatocellular carcinoma after liver resection: retrospective study of the Milan and Hangzhou criteria                                   | Excluded          | Outcome irrelevant    |
| B. P. Saborido et al. 2005 | Does preoperative fine needle aspiration-biopsy produce tumor recurrence in patients following liver transplantation for hepatocellular carcinoma?                                   | Excluded          | Outcome irrelevant    |
| K. Staufer et al. 2012     | High toxicity of sorafenib for recurrent hepatocellular carcinoma after liver transplantation                                                                                        | Excluded          | Outcome irrelevant    |
| C. Zavaglia et al. 2013    | Adverse events affect sorafenib efficacy in patients with recurrent hepatocellular carcinoma after liver transplantation: experience at a single center and review of the literature | Excluded          | Outcome irrelevant    |

**Table S3:** Characteristics of included studies

| S. No | Author                   | Year | Country       | Sample size | Mean Age (years) | Male (%) |
|-------|--------------------------|------|---------------|-------------|------------------|----------|
| 1     | Ataide et al.            | 2011 | Brazil        | 83          | 55.3             | 82       |
| 2     | Alvite-Canosa et al.     | 2010 | Spain         | 150         | 56.4             | 88       |
| 3     | Baskiran et al.          | 2020 | Turkey        | 194         | NR               | NR       |
| 4     | Bassanello et al.        | 2003 | Italy         | 48          | 52*              | 83.3     |
| 5     | Bernal et al.            | 2006 | Spain         | 12          | 48               | 92       |
| 6     | Bilbao et al.            | 2009 | Spain         | 25          | 55.6             | 76       |
| 7     | Campsen et al.           | 2013 | USA           | 354         | 51.8             | 81.6     |
| 8     | Chagas et al.            | 2019 | Brazil        | 1119        | 58               | 66.9     |
| 9     | Chan et al.              | 2020 | China         | 265         | 49*              | 88.9     |
| 10    | Chao et al.              | 2007 | San Francisco | 100         | 55.5             | 71       |
| 11    | Chung et al.             | 1994 | France        | 125         | 52.6*            | 85.6     |
| 12    | D'Amico et al.           | 2009 | Italy         | 479         | 56.8             | 78       |
| 13    | Revilla et al.           | 2003 | USA           | 10          | 55               | 100      |
| 14    | Martin et al.            | 2008 | Italy         | 71          | 54*              | 70.8     |
| 15    | Escartin et al.          | 2007 | Spain         | 202         | 59               | 73.7     |
| 16    | Fan et al.               | 2009 | China         | 1078        | 49*              | 88.9     |
| 17    | Farinati et al.          | 2001 | Italy         | 4           | 63.4*            | 65       |
| 18    | Fernandez-Sevilla et al. | 2017 | France        | 493         | 55*              | 87.1     |
| 19    | Ferris et al.            | 1996 | USA           | 124         | 54               | 80       |
| 20    | Foltys et al.            | 2014 | Germany       | 41          | 61.3*            | 82.4     |

| S. No | Author                  | Year | Country               | Sample size | Mean Age (years) | Male (%) |
|-------|-------------------------|------|-----------------------|-------------|------------------|----------|
| 21    | Gonzalez-Uriarte et al. | 2003 | USA                   | 88          | 58*              | 77.2     |
| 22    | Ito et al.              | 2007 | Japan                 | 125         | 55*              | 71.2     |
| 23    | Kim et al.              | 2011 | South Korea and China | 132         | 55*              | 89.7     |
| 24    | Kiyici et al.           | 2008 | Turkey                | 72          | 52.3             | 84.7     |
| 25    | Kornberg et al.         | 2009 | Germany               | 42          | 61*              | 83.3     |
| 26    | Kornberg et al.         | 2011 | Germany               | 60          | 58.2             | 76.6     |
| 27    | Kornberg et al.         | 2018 | Germany               | 119         | 58.5             | 59.6     |
| 28    | Kornberg et al.         | 2015 | Germany               | 103         | 58.6             | 62.1     |
| 29    | Lai et al.              | 2013 | Belgium, Italy        | 422         | 60*              | 82.4     |
| 30    | Lee et al.              | 2005 | South Korea           | 87          | NR               | NR       |
| 31    | Lei et al.              | 2013 | China                 | 31          | 43               | 64.5     |
| 32    | Li et al.               | 2011 | China                 | 148         | 47.1             | 86.7     |
| 33    | Llovet et al.           | 1998 | Spain                 | 58          | 52.4             | 81       |
| 34    | Macaron et al.          | 2010 | USA                   | 107         | 55.9*            | 86.9     |
| 35    | Marsh et al.            | 1998 | USA                   | 214         | 50.4             | 74.7     |
| 36    | Ares et al.             | 2004 | Spain                 | 80          | 52.6             | 81.2     |
| 37    | Marubashi et al.        | 2006 | USA                   | 25          | NR               | 72       |
| 38    | Miyagi et al.           | 2012 | Japan                 | 14          | 53.1             | 64.2     |
| 39    | Northen et al.          | 2018 | Germany               | 63          | 59.6             | 84.1     |
| 40    | Otto et al.             | 2007 | Germany               | 60          | 60.1*            | 76.6     |
| 41    | Otto et al.             | 1997 | Germany               | 50          | 45.8             | 80       |
| 42    | Quan et al.             | 2006 | UK                    | 75          | 53.5             | 84       |
| 43    | Park et al.             | 2006 | Korea                 | 156         | 50.1*            | 95.6     |
| 44    | Luque et al.            | 2006 | Spain                 | 81          | 53.8             | 88.9     |
| 45    | Pfiffer et al.          | 2011 | Germany               | 139         | 57.8             | 95.8     |
| 46    | Philosophe et al.       | 1998 | Canada                | 60          | 56*              | NR       |
| 47    | Ramos et al.            | 2006 | Spain                 | 67          | 60               | 61.1     |
| 48    | Rayya et al.            | 2008 | Germany               | 11          | 56*              | 81.8     |
| 49    | Regalia et al.          | 1997 | Italy                 | 132         | 50               | 15.9     |
| 50    | Sa et al.               | 2016 | Brazil                | 414         | 56               | 79.5     |
| 51    | Samoylova et al.        | 2014 | USA                   | 5002        | 57*              | 77.4     |
| 52    | Sadow et al.            | 2018 | New Orlean            | 82          | 59.6             | 78.4     |
| 53    | Santoyo et al.          | 2009 | Spain                 | 186         | NR               | NR       |
| 54    | Santoyo et al.          | 2005 | Spain                 | 53          | 57               | 81.3     |
| 55    | Sauer et al.            | 2005 | Germany               | 110         | NR               | #VALUE!  |
| 56    | Schraiber et al.        | 2016 | Brazil                | 206         | 56.3             | 74.7     |
| 57    | Sha et al.              | 2012 | China                 | 48          | NR               | 91.6     |
| 58    | Sieghart et al.         | 2011 | Austria               | 125         | 54.5             | 84.8     |
| 59    | Silva et al.            | 2008 | Spain                 | 257         | 60*              | 80.5     |
| 60    | Taketomi et al.         | 2010 | Japan                 | 101         | NR               | 71.2     |
| 61    | Tan et al.              | 1995 | UK                    | 15          | NR               | NR       |

| S. No | Author                | Year | Country       | Sample size | Mean Age (years) | Male (%) |
|-------|-----------------------|------|---------------|-------------|------------------|----------|
| 62    | Triana et al.         | 2016 | Spain         | 10          | 11.5             | 80       |
| 63    | Varona et al.         | 2009 | Spain         | 61          | 55*              | 80       |
| 64    | Vatansever et al.     | 2019 | Turkey        | 54          | 55.6             | 92.5     |
| 65    | Vigano et al.         | 2015 | Italy         | 101         | 54*              | 94       |
| 66    | Vitale et al.         | 2012 | Italy         | 165         | NR               | NR       |
| 67    | Wan et al.            | 2014 | China         | 130         | 49.5             | 86.1     |
| 68    | Wan et al.            | 2014 | China         | 226         | 50.2             | 84.9     |
| 69    | Xu et al.             | 2009 | China         | 97          | 47.9             | 89.69072 |
| 70    | Yi et al.             | 2007 | Korea         | 85          | NR               | NR       |
| 71    | Yokoyama et al.       | 1991 | USA           | 106         | 43.4             | 66.9     |
| 72    | Zimmerman et al.      | 2007 | USA           | 100         | 56               | 81       |
| 73    | Diniz et al.          | 2020 | Brazil        | 127         | 57.7             | 80       |
| 74    | Morgul et al.         | 2020 | Germany       | 120         | 61               | 81.7     |
| 75    | Pravisani et al.      | 2020 | Italy         | 280         | 57               | 89.6     |
| 76    | Yang et al.           | 2020 | China         | 62          | 52               | 90       |
| 77    | Ismael et al.         | 2019 | USA           | 160         | 58               | 78.1     |
| 78    | Kang et al.           | 2019 | Korea         | 239         | 56               | 90       |
| 79    | Lee et al.            | 2019 | Korea         | 122         | 54               | 84.4     |
| 80    | Mahmud et al.         | 2019 | USA           | 18406       | 57.5             | 78.5     |
| 81    | Polat et al.          | 2019 | Turkey        | 165         | 57.7             | 80       |
| 82    | Zeair et al.          | 2019 | Poland        | 166         | 58               | 74.6     |
| 83    | Zeng et al.           | 2019 | China         | 99          | 48.4             | 90       |
| 84    | Foerster et al.       | 2018 | Germany       | 304         | 59.9             | 77.3     |
| 85    | Mehta et al.          | 2018 | USA           | 740         | 58               | 74.2     |
| 86    | Pinna et al.          | 2018 | Italy, China  | 1218        | 53.7             | 86.6     |
| 87    | Sadler et al.         | 2018 | USA           | 929         | 63.1             | 61.7     |
| 88    | Valverde-Lopez et al. | 2018 | Spain         | 89          | 57.9             | 69       |
| 89    | Yilmaz et al.         | 2018 | Turkey        | 187         | 55.3             | 86.6     |
| 90    | Halazun et al.        | 2017 | USA           | 339         | 57.8             | 80       |
| 91    | Kamel et al.          | 2017 | Egypt         | 60          | 52               | 93       |
| 92    | Kositamongkol et al.  | 2017 | Thailand      | 63          | 54               | 95       |
| 93    | Pinero et al.         | 2017 | Latin America | 435         | 55               | 73       |
| 94    | Azoulay et al.        | 2016 | France        | 651         | 57               | 81.7     |
| 95    | Boteon et al.         | 2016 | Brazil        | 101         | 55.8             | 86.1     |
| 96    | Colhoun et al.        | 2016 | USA           | 141         | 58               | 78       |
| 97    | Donat et al.          | 2016 | Spain         | 151         | 54.5             | 78.1     |
| 98    | Grat et al.           | 2016 | Poland        | 240         | 57               | 72       |
| 99    | Irtan et al.          | 2016 | France        | 179         | 54               | 88.8     |
| 100   | Yang et al.           | 2016 | Korea         | 88          | 59               | 81       |
| 101   | Macdonald et al.      | 2015 | USA           | 1074        | 57.5             | 75       |
| 102   | Orci et al.           | 2015 | Switzerland   | 9724        | 57               | 75       |
| 103   | Costa et al.          | 2014 | Brazil        | 140         | 56.5             | 82.1     |

| S. No | Author              | Year | Country          | Sample size | Mean Age (years) | Male (%) |
|-------|---------------------|------|------------------|-------------|------------------|----------|
| 104   | Squires III et al.  | 2014 | USA              | 131         | 59               | 73.5     |
| 105   | Wong et al.         | 2014 | USA              | 114         | 61.3             | 77.5     |
| 106   | Choi et al.         | 2013 | Korea            | 224         | 50.8             | 89.2     |
| 107   | Doyle et al.        | 2012 | USA              | 264         | 55.9             | 79       |
| 108   | Sharma et al.       | 2012 | USA              | 94          | 54.5             | 71       |
| 109   | Chan et al.         | 2011 | Taiwan           | 126         | 50.5             | 78       |
| 110   | Chok et al.         | 2011 | Hong Kong, China | 139         | 49.5             | 98       |
| 111   | Kaido et al.        | 2011 | Japan            | 164         | 56               | 65       |
| 112   | Lai et al.          | 2011 | Italy            | 153         | 57               | 83       |
| 113   | Coelho et al.       | 2009 | Brazil           | 45          | 56               | 79       |
| 114   | McHugh et al.       | 2009 | USA              | 101         | 55.7             | 79       |
| 115   | Castroagudin et al. | 2008 | Spain            | 130         | 57.8             | 81       |
| 116   | Lee et al.          | 2008 | Korea            | 221         | 51               | 79.2     |
| 117   | Malago et al.       | 2006 | Germany          | 34          | 54               | 75       |
| 118   | Parfitt et al.      | 2006 | Canada           | 75          | 57.5             | 89       |
| 119   | Island et al.       | 2005 | USA              | 92          | 53               | 80       |
| 120   | Merli et al.        | 2005 | Italy            | 63          | 54               | 80       |
| 121   | Roayaie et al.      | 2004 | US               | 311         | 56               |          |
| 122   | Todo et al.         | 2004 | Japan            | 316         | 59               | 86       |
| 123   | De Carlis et al.    | 2003 | Italy            | 99          | 51               | 80       |
| 124   | Vivarelli et al.    | 2002 | Italy            | 82          | 56               | 85       |
| 125   | Chui et al.         | 1999 | Hong Kong, China | 24          | 49               | 98       |

\*: Median; NR: Not Reported; USA: United States of America; UK: United Kingdom
